# Supplementary material for: Prevalence of Co-occurring Medical and Behavioral Conditions/Symptoms Among 4- and 8-Year-Old Children with Autism Spectrum Disorder in Selected Areas of the United States in 2010
Source: Springer Nature journal article supplement (doi:10.1007/s10803-018-3521-1), 2018-03-09
Supplement: MOESM1 [file 15524302]

Supplemental Table 1 List of co-occurring conditions/symptoms assessed in the summary composite file of children in
the ADDM Network

| **Diagnosis** | **Abbreviation** | **Notes** |
| --- | --- | --- |
| Childhood abuse or neglect | ABUSE | Includes childhood neglect |
| **Abnormalities in eating, drinking** | **EAT** |  |
| Adjustment disorder | ADJUST |  |
| **Aggression** | **AGGR** |  |
| Apraxia | APRAX |  |
| Articulation disorder | ARTIC |  |
| Attachment disorder | ATTACH |  |
| **Anxiety disorder** | **ANX** | **Includes diagnosis of any anxiety disorder other than OCD, which is coded separately (e.g., generalized anxiety, phobias, and “separation anxiety”)** |
| **Attention Hyperactivity Disorder** | **ADHD/ADD** |  |
| Behavior disorder | BD | Includes eligibility for Emotional Behavioral Disabled (EBD) |
| Bipolar disorder | BIP |  |
| Brain injury | BRAIN | Includes traumatic brain injury (TBI) |
| Catatonia | CAT |  |
| **Cerebral palsy*** | **CP** |  |
| Conduct disorder | COND |  |
| Depression | DEP |  |
| Developmental delay, general or Significant Dev Delay (SDD) | DD GEN | Includes statement of “Global Delay” and Developmental Delay-Not Otherwise-Specified. |
| **Dev delay, adaptive** | **DD ADAPT** | Delay when adaptive score <70 |
| **Dev delay, cognitive** | **DD COG** | Delay when cognitive score <70 |
| **Dev delay, language** | **DD LANG** | Includes “communication delay” except articulation delays or problems. Includes meets eligibility for Speech/Language Impairment (SLI). |
| **Dev delay, motor** | **DD MOTOR** | Includes dx of “Hypotonia” and Coordination disorder |
| Dev delay, social | DD SOC | Includes personal/social |
| Dev delay, play | DD PLAY |  |
| **Developmental regression** | **REGR** |  |
| **Down syndrome**** | **DOWN** |  |
| Emotional disorder | ED |  |
| **Encephalopathy*** | **ENC** |  |
| **Epilepsy / sz disorder** | **EP/SZ** |  |
| Fetal Alcohol Syndrome / Effects | FAS |  |
| **Fragile X syndrome**** | **FRAX** |  |
| **Hearing loss*** | **HL** |  |
| Learning disability | LD | Includes eligibility for Learning Disabled |
| Intellectual Disability / Mental Retardation | ID | Generalized learning problem related to low intellectual ability. Includes eligibility for Mental Retardation/Intellectual Disability |
| **Mood disorder** | **MD** |  |
| Mutism | MUTE |  |
| Nonverbal learning disorder | NLD |  |
| OCD | OCD | Obsessive Compulsive Disorder |
| **ODD** | **ODD** | **Oppositional Defiant Disorder** |
| Personality disorder | PERS |  |
| Prematurity | PREM | The child was “premature”. “Prematurity” with no gestational age listed. The child was born prior to 37 weeks gestation. |
| Psychosis | PSY |  |
| Rett disorder | Rett |  |
| Reactive attachment disorder | RAD |  |
| Schizophrenia | SCHZ |  |
| **Sensory integration disorder** | **SID** | **Includes Sensory Processing Disorder** |
| **Sleep abnormalities** | **SLEEP** |  |
| **Self-injurious behaviors** | **SIB** |  |
| Social communication disorder | SCD |  |
| (Prenatal) substance exposure | SUBST | Includes illegal and prescription drugs |
| Tourette’s disorder | TOUR |  |
| **Tuberous sclerosis**** | **TS** |  |
| **Vision impairment*** | **VI** |  |
| Other | OTH | Provide a brief description on the line marked as “OTHER” |

Conditions/symptoms in bold were included in this analysis; * These conditions were grouped in congenital conditions; ** These conditions were grouped in genetic conditions
